# Supplementary material for: Efficacy and safety of CT-P59 plus standard of care: a phase 2/3 randomized, double-blind, placebo-controlled trial in outpatients with mild-to-moderate SARS-CoV-2 infection
Source: Research Square preprint supplement (doi:10.21203/rs.3.rs-296518/v1), 2021-03-15
Supplement: Supplementary file 2 [file 5a77d4e38afa3f2887f4e836.zip]

Archive with 2 entries (2 files):
- CT-P59 3.2 SAP_redacted.pdf
- CT-P59 3.2_Protocol_V3.1_redacted.pdf
